# Supplementary material
Source: Springer Nature journal article supplement (https://www.springermedizin.de/resource/supplementary/12916_2006_103_MOESM6_ESM.pdf/9599212)
Supplement: MOESM6 [file 9599212]

**Table 3 - Associations between the amount of fat in the lumbar multifidus muscles and LBP in 40 year-old men (n=199) and women (n=213).**

| Fat infiltration        | Unadjusted     |                | Adjusted*          |                    |
|-------------------------|----------------|----------------|--------------------|--------------------|
|                         | LBP year       | LBP ever       | LBP year           | LBP ever           |
| <b>Men and women</b>    |                |                |                    |                    |
| Any                     | 1.7 (1.1-2.6)  | 2.6 (1.5-4.4)  | 1.8 (1.2-2.8)      | 2.9 (1.5-5.5)      |
| Slight (grades 1 vs. 0) | 1.5 (0.9-2.5)  | 2.5 (1.4-4.7)  | 1.6 (0.9 -2.8)     | 2.9 (1.5 -5.5)     |
| Severe (grades 2 vs. 0) | 3.6 (1.4-9.7)  | 7.2 (1.6-32.4) | 4.1 (1.5 -11.2)    | 9.2 (2.0-43.2)     |
| Severe (grades 2 vs. 1) | 2.5 (1.0-6.1)  | 2.8 (0.7-12.2) | 2.5 (1.0-6.4)      | 3.2 (0.7-14.1)     |
| <b>Men</b>              |                |                |                    |                    |
| Any                     | 1.4 (0.9–2.5)  | 2.8 (1.4–5.9)  | 1.5 (0.8–2.6)      | 3.0 (1.4–6.4)      |
| Slight (grades 1 vs. 0) | 1.6 (0.8–3.0)  | 3.1 (1.4–6.4)  | 1.7 (0.9 –3.3)     | 3.4 (1.5 –7.7)     |
| Severe (grades 2 vs. 0) | 1.9 (0.5–6.6)  | 5.7 (0.7–46.9) | 1.7 (0.5 –6.2)     | 5.7 (0.7–48.0)     |
| Severe (grades 2 vs. 1) | 1.2 (0.4–4.0)  | 1.9 (0.2–15.2) | 1.0 (0.3–3.5)      | 1.7 (0.2–14.2)     |
| <b>Women</b>            |                |                |                    |                    |
| Any                     | 2.4 (1.3–4.5)  | 2.7 (1.2–6.1)  | 2.8 (1.4–5.7)      | 3.2 (1.3–7.9)      |
| Slight (grades 1 vs. 0) | 1.6 (0.6–4.1)  | 2.4 (0.8–6.8)  | 1.7 (0.7–4.5)      | 2.7 (0.9–8.1)      |
| Severe (grades 2 vs. 0) | 8.3 (1.5–44.5) | 9.2 (1.0–84.3) | 11.6 (2.0– 66.7)** | 15.1 (1.5–154.3)** |
| Severe (grades 2 vs. 1) | 5.1 (1.1–22.4) | 3.8 (0.5–29.7) | 6.7 (1.4–30.8)     | 5.7 (0.7–46.9)     |

Data are expressed as odds ratios (95% confidence intervals).

\*Adjusted for BMI, physical activity, physical workload, and hours participating in sports;

\*\* time in sports, and body weight remained significant in multivariate analyses.

LBP, lower back pain; LBP ever, had ever experienced lower back pain; LBP year, had experienced lower back pain in previous year.
